# Supplementary material for: A method for the quantitative analysis of polar anionic pesticides in milk/infant formula, cereals and fruit and vegetables using ion chromatography coupled to tandem mass spectrometry
Source: Royal Society of Chemistry journal article supplement (doi:10.1039/d4ay00183d), 2024-01-01
Supplement: d4ay00183d1.pdf [file d4ay00183d1.pdf]

1 **Electronic Supplementary Material (ESM)**

2

3 Additional tables, describing method validation details, can be found in the electronic supplementary  
4 material online.

5

6 Table S1

7

|                                    | Cereals | Infant formula | Fruit and vegetables |
|------------------------------------|---------|----------------|----------------------|
| Sample weight (g)                  | 2       | 4              | 10                   |
| Water (ml)                         | 10      | 0              | 0                    |
| Methanol (ml)                      | 10      | 4              | 10                   |
| Acidified with 3% Acetic acid (ml) | No      | 0.4            | No                   |
| Freeze at -80°C (min)              | 10      | No             | 10                   |
| Centrifuge at 4000rpm (min)        | 8       | 8              | 8                    |
| SPE clean up                       | Yes     | Yes            | Filter only          |
| Sample taken (µl)                  | 100     | 100            | 100                  |
| Water added (µl)                   | 900     | 900            | 400                  |
| Final dilution                     | 1/100   | 1/20           | 1/10                 |

8

9

10 **Table S2 – Ion source parameters**

11

12 Method duration 21 mins

13 Ion source type HESI

14 Spray voltage Static

15 Positive ion 3500 V

16 Negative ion 2500 V

17 Sheath gas (Arb) 60

18 Aux gas (Arb) 15

19 Sweep gas (Arb) 2

20 Ion transfer tube temp 380°C

21 Vaporiser temp 350°C

22

23

24

25

26

27

28

29 Table S3 – Optimised transitions for the analytes covered by the scope of the method.

30

| Pesticide                         | Quan transition | T2              | T3              | T4              |
|-----------------------------------|-----------------|-----------------|-----------------|-----------------|
| Aminomethylphosphonic acid (AMPA) | 109.9 --> 62.8  | 109.9 --> 78.8  | 109.9 --> 80.8  |                 |
| Chlorate                          | 82.9 --> 66.8   | 82.9 --> 50.9   | 84.9 --> 68.8   |                 |
| Cyanuric acid                     | 128 --> 41.9    | 128 --> 84.9    |                 |                 |
| Dicamba                           | 218.8 --> 174.9 | 218.8 --> 144.8 | 218.8 --> 34.9  |                 |
| Ethephon                          | 142.9 --> 106.9 | 142.9 --> 62.9  | 142.9 --> 78.9  |                 |
| Fosetyl Aluminium                 | 108.9 --> 80.9  | 108.9 --> 62.9  | 108.9 --> 78.8  |                 |
| Glufosinate                       | 179.9 --> 94.9  | 179.9 --> 136.0 | 179.9 --> 118.9 |                 |
| Glyphosate                        | 167.8 --> 80.8  | 167.8 --> 62.9  | 167.8 --> 149.9 | 167.8 --> 123.9 |
| HEPA (ethephon metabolite)        | 124.8 --> 78.8  | 124.8 --> 94.9  | 124.8 --> 62.8  |                 |
| Maleic Hydrazide                  | 110.9 --> 81.9  | 110.9 --> 82.9  | 110.9 --> 54.9  | 110.9 --> 41.8  |
| MPPA (Glufosinate metabolite)     | 150.9 --> 132.9 | 150.9 --> 106.9 | 150.9 --> 62.8  | 150.9 --> 77.9  |
| N-Acetyl AMPA                     | 152 --> 109.9   | 152 --> 62.8    | 152 --> 78.8    | 152 --> 133.9   |
| N-Acetyl Glufosinate              | 221.9 --> 134.0 | 221.9 --> 136.0 | 221.9 --> 178   | 221.9 --> 58.9  |
| N-Acetyl Glyphosate               | 209.9 --> 123.9 | 209.9 --> 147.9 | 209.9 --> 62.8  | 209.9 --> 78.8  |
| Perchlorate                       | 98.8 --> 82.8   | 98.8 --> 66.8   | 98.8 --> 50.9   |                 |
| Phosphonic Acid                   | 80.7 --> 78.7   | 80.7 --> 62.8   |                 |                 |

31

32

33 Table S4 – The % difference between the standard concentration and the back calculated standard

34 concentrations

35

|                      | Wheat | Infant Formula | Fruit and Vegetables |
|----------------------|-------|----------------|----------------------|
| AMPA                 | 7.8   | 0.2            | 2.3                  |
| Chlorate             | -1.7  | 1.3            | 0.8                  |
| Cyanuric Acid        | 1.3   | -0.2           | 0.1                  |
| Dicamba              | -0.2  | 3.3            | -1.3                 |
| Ethephon             | -11.2 | -0.5           | 1.6                  |
| Fosetyl              | 2.4   | 3.5            | -1.4                 |
| Glufosinate          | -1.3  | 0.9            | 4.7                  |
| Glyphosate           | 2.9   | 1.2            | 1.9                  |
| HEPA                 | 0.4   | 1.0            | -7.8                 |
| Maleic Hydrazide     | 0.0   | 4.8            | -3.9                 |
| MPPA                 | -0.3  | 0.4            | -2.6                 |
| N-acetyl AMPA        | 0.2   | 1.7            | -6.4                 |
| N-acetyl glufosinate | 0.1   | 0.7            | -4.1                 |
| N-acetyl Glyphosate  | 1.8   | 2.4            | -3.0                 |
| Perchlorate          | -0.2  | 0.3            | -0.3                 |
| Phosphonic Acid      | -2.8  | 0.3            | 9.6                  |

36 Table S5a – repeatability for wheat and infant formula

37

| Wheat                |  | Accuracy |      |       |       |       |       |        |       |       |       |       |       |       |       | Mean  | s   | % CV  |
|----------------------|--|----------|------|-------|-------|-------|-------|--------|-------|-------|-------|-------|-------|-------|-------|-------|-----|-------|
|                      |  | 10       |      | 50    |       | 100   |       | 200    |       | 500   |       | 1000  |       | 2500  |       |       |     |       |
|                      |  | A1       | A2   | A1    | A2    | A1    | A2    | A1     | A2    | A1    | A2    | A1    | A2    | A1    | A2    |       |     |       |
| Chlorate             |  | 79.0     | 76.3 | 89.6  | 74.6  | 98.3  | 96.9  | 86.1   | 87.1  | 89.5  | 81.9  | 93.5  | 93.5  | 108.7 | 104.4 | 90.0  | ### | 11.3  |
| Dicamba              |  | 77.4     | 88.6 | 70.1  | 65.2  | 120.6 | 96.0  | 69.8   | 77.4  | 130.5 | 82.8  | 98.2  | 106.2 | 98.9  | 87.7  | 90.7  | ### | 21.2  |
| Ethephon             |  | 87.2     | 78.7 | 129.8 | 115.1 | 103.0 | 100.3 | 122.9  | 129.8 | 89.6  | 89.4  | 96.9  | 100.3 | 89.8  | 81.5  | 101.0 | ### | 17.0  |
| Fosetyl Aluminium    |  | 34.8     | 32.0 | 38.9  | 32.2  | 48.6  | 50.3  | 1.6    | 35.3  | 76.5  | 55.1  | 90.4  | 86.1  | 101.3 | 71.5  | 53.9  | ### | 51.7  |
| Glufosinate          |  | 53.8     | 34.8 | 63.7  | 54.1  | 71.4  | 68.6  | 63.4   | 101.5 | 121.2 | 106.0 | 69.6  | 129.8 | 106.4 | 144.8 | 91.7  | ### | 33.0  |
| Glyphosate           |  | 87.3     | 97.0 | 80.2  | 69.8  | 89.3  | 82.0  | 74.0   | 77.4  | 78.1  | 60.8  | 84.7  | 75.5  | 76.4  | 60.8  | 78.1  | ### | 12.9  |
| HEPA                 |  | 107.8    | 92.5 | 85.7  | 83.0  | 100.6 | 127.7 | 87.4   | 92.7  | 111.2 | 91.1  | 103.5 | 102.0 | 100.2 | 103.1 | 99.2  | ### | 11.9  |
| Maleic Hydrzide      |  | 85.2     | 88.2 | 77.5  | 88.5  | 96.3  | 107.5 | 82.7   | 89.9  | 92.8  | 92.2  | 105.9 | 118.0 | 106.2 | 99.7  | 95.0  | ### | 11.8  |
| MPPA                 |  | 106.3    | 98.0 | 81.6  | 74.1  | 110.7 | 110.0 | 81.0   | 87.9  | 109.4 | 90.8  | 100.5 | 103.3 | 100.5 | 102.4 | 96.9  | ### | 12.2  |
| N-Acetyl AMPA        |  | 93.8     | 76.3 | 86.4  | 85.5  | 115.0 | 113.3 | 86.5   | 98.4  | 129.6 | 93.1  | 97.0  | 107.0 | 92.4  | 107.9 | 98.7  | ### | 14.5  |
| N-acetyl glufosinate |  | 119.5    | 79.5 | 66.3  | 85.9  | 123.3 | 122.5 | 84.6   | 91.5  | 114.2 | 99.3  | 122.7 | 107.4 | 102.8 | 112.6 | 102.3 | ### | 17.9  |
| N-acetyl Glyphosate  |  | 82.3     | 96.2 | 84.5  | 69.1  | 101.6 | 101.2 | 85.8   | 86.6  | 85.0  | 83.2  | 92.2  | 92.7  | 82.4  | 96.2  | 88.5  | ### | 9.9   |
| Perchlorate          |  | 49.3     | 50.7 | 58.1  | 43.9  | 88.8  | 87.2  | 47.7   | 52.5  | 80.5  | 78.9  | 90.1  | 82.0  | 98.7  | 93.7  | 71.6  | ### | 27.9  |
| Phosphonic acid      |  | 22.2     | 12.8 | 20.6  | 13.2  | 17.1  | 16.2  | -119.2 | -66.1 | -3.3  | -17.1 | 29.2  | 42.5  | 61.7  | 76.9  | 7.6   | ### | 653.2 |

  

| Wheat                |  | Precision |      |      |      |      |      |       |      |        |       |      |      |      |      | Mean  |
|----------------------|--|-----------|------|------|------|------|------|-------|------|--------|-------|------|------|------|------|-------|
|                      |  | 10        |      | 50   |      | 100  |      | 200   |      | 500    |       | 1000 |      | 2500 |      |       |
|                      |  | A1        | A2   | A1   | A2   | A1   | A2   | A1    | A2   | A1     | A2    | A1   | A2   | A1   | A2   |       |
| Chlorate             |  | 5.7       | 8.7  | 9.8  | 10.1 | 4.7  | 2.9  | 2.5   | 2.0  | 11.2   | 8.6   | 3.8  | 3.8  | 4.6  | 6.6  | 6.1   |
| Dicamba              |  | 24.5      | 21.4 | 12.3 | 10.0 | 11.4 | 9.3  | 8.2   | 4.3  | 7.7    | 13.7  | 8.3  | 10.2 | 16.7 | 14.4 | 12.3  |
| Ethephon             |  | 19.8      | 8.4  | 7.4  | 7.4  | 3.9  | 6.0  | 3.0   | 1.1  | 4.2    | 3.5   | 13.8 | 2.9  | 22.6 | 2.4  | 7.6   |
| Fosetyl Aluminium    |  | 3.8       | 4.8  | 9.7  | 8.5  | 4.6  | 3.3  | 104.2 | 6.8  | 14.0   | 9.2   | 9.4  | 6.1  | 10.1 | 3.7  | 14.2  |
| Glufosinate          |  | 36.2      | 32.7 | 6.4  | 6.6  | 9.0  | 14.0 | 11.7  | 5.3  | 5.8    | 13.4  | 5.6  | 5.2  | 21.6 | 5.0  | 9.1   |
| Glyphosate           |  | 12.8      | 18.1 | 9.4  | 15.8 | 8.9  | 3.7  | 5.7   | 4.1  | 13.9   | 10.0  | 2.3  | 2.7  | 5.6  | 8.1  | 8.6   |
| HEPA                 |  | 17.6      | 10.2 | 10.8 | 7.5  | 4.5  | 4.4  | 2.9   | 3.0  | 9.3    | 8.5   | 5.3  | 2.3  | 10.0 | 4.9  | 7.2   |
| Maleic Hydrzide      |  | 33.1      | 18.1 | 20.3 | 11.3 | 12.8 | 12.7 | 12.4  | 11.3 | 10.5   | 5.7   | 9.6  | 8.4  | 10.7 | 9.6  | 13.3  |
| MPPA                 |  | 9.0       | 6.8  | 10.7 | 6.3  | 3.1  | 4.4  | 6.4   | 2.4  | 5.6    | 3.0   | 2.4  | 1.3  | 1.2  | 4.4  | 4.8   |
| N-Acetyl AMPA        |  | 14.5      | 7.0  | 9.8  | 9.0  | 5.4  | 4.6  | 2.1   | 2.8  | 11.9   | 10.5  | 3.3  | 1.8  | 4.4  | 6.2  | 6.7   |
| N-acetyl glufosinate |  | 11.8      | 18.4 | 6.0  | 8.0  | 7.3  | 8.2  | 3.8   | 2.8  | 8.1    | 8.3   | 15.6 | 2.3  | 21.4 | 5.3  | 9.1   |
| N-acetyl Glyphosate  |  | 18.1      | 10.7 | 10.5 | 14.4 | 7.1  | 2.8  | 3.3   | 3.2  | 15.0   | 14.0  | 2.8  | 1.3  | 2.0  | 5.9  | 7.9   |
| Perchlorate          |  | 6.4       | 5.2  | 7.0  | 9.1  | 3.4  | 2.4  | 5.3   | 4.8  | 11.5   | 9.8   | 2.7  | 1.0  | 1.5  | 5.8  | 5.4   |
| Phosphonic acid      |  | 18.4      | 10.4 | 8.6  | 17.2 | 7.0  | 2.1  | -2.9  | -7.4 | -324.0 | -58.8 | 11.7 | 7.5  | 5.1  | 8.7  | -21.2 |

  

| Infant Formula       |  | Accuracy |       |       |       |       |       |       |       |       |       |       |       |       |     | Mean | s | % CV |
|----------------------|--|----------|-------|-------|-------|-------|-------|-------|-------|-------|-------|-------|-------|-------|-----|------|---|------|
|                      |  | 10       |       | 20    |       | 40    |       | 100   |       | 200   |       | 500   |       |       |     |      |   |      |
|                      |  | A1       | A2    | A1    | A2    | A1    | A2    | A1    | A2    | A1    | A2    | A1    | A2    |       |     |      |   |      |
| Chlorate             |  | 86.3     | 93.5  | 129.2 | 84.2  | 93.5  | 94.1  | 89.9  | 93.9  | 95.5  | 122.2 | 124.5 | 130.6 | 103.1 | ### | 17.3 |   |      |
| Dicamba              |  | 83.4     | 76.4  | 126.2 | 82.1  | 88.5  | 86.9  | 87.4  | 89.8  | 85.2  | 84.8  | 82.8  | 82.4  | 88.0  | ### | 14.3 |   |      |
| Ethephon             |  | 90.2     | 80.4  | 115.3 | 99.3  | 92.0  | 94.3  | 89.9  | 94.9  | 94.8  | 99.8  | 94.0  | 101.7 | 95.5  | 8.3 | 8.7  |   |      |
| Fosetyl Aluminium    |  | 103.3    | 110.7 | 99.2  | 118.7 | 94.9  | 96.7  | 92.8  | 95.5  | 92.5  | 95.9  | 100.0 | 100.1 | 100.0 | 7.7 | 7.7  |   |      |
| Glufosinate          |  | 47.2     | 34.0  | 82.5  | 68.7  | 78.5  | 64.7  | 85.6  | 87.8  | 93.1  | 101.2 | 100.9 | 103.9 | 86.7  | ### | 15.6 |   |      |
| Glyphosate           |  | 102.4    | 102.4 | 115.9 | 84.1  | 90.4  | 85.2  | 88.1  | 85.3  | 84.6  | 95.0  | 90.7  | 97.7  | 93.5  | 9.7 | 10.4 |   |      |
| HEPA                 |  | 108.3    | 93.5  | 134.9 | 101.0 | 108.7 | 110.3 | 102.5 | 104.6 | 101.2 | 114.8 | 110.3 | 116.5 | 108.9 | ### | 9.6  |   |      |
| Maleic Hydrzide      |  | 123.6    | 98.9  | 115.7 | 94.0  | 94.4  | 94.1  | 92.0  | 101.2 | 115.8 | 111.8 | 113.7 | 116.9 | 106.0 | ### | 10.6 |   |      |
| MPPA                 |  | 88.4     | 87.4  | 128.6 | 94.7  | 95.7  | 96.5  | 90.9  | 93.1  | 93.1  | 105.5 | 95.4  | 104.9 | 97.8  | ### | 11.4 |   |      |
| N-Acetyl AMPA        |  | 97.1     | 86.1  | 140.0 | 96.2  | 103.5 | 104.7 | 99.1  | 101.4 | 95.1  | 107.1 | 104.1 | 109.1 | 103.6 | ### | 12.6 |   |      |
| N-acetyl glufosinate |  | 95.4     | 88.1  | 128.7 | 92.1  | 98.8  | 96.7  | 93.6  | 94.6  | 92.1  | 99.3  | 93.3  | 98.2  | 97.6  | ### | 10.6 |   |      |
| N-acetyl Glyphosate  |  | 83.0     | 84.5  | 122.9 | 86.3  | 93.8  | 90.3  | 88.3  | 89.2  | 83.3  | 95.5  | 90.2  | 96.3  | 92.0  | ### | 11.6 |   |      |
| Perchlorate          |  | 78.2     | 71.5  | 100.5 | 73.2  | 81.3  | 81.6  | 77.5  | 79.1  | 78.1  | 93.1  | 90.3  | 98.1  | 83.5  | 9.6 | 11.5 |   |      |
| Phosphonic acid      |  | 86.7     | 74.2  | 114.2 | 74.8  | 21.6  | 40.1  | 60.4  | 70.6  | 91.5  | 76.5  | 97.0  | 92.3  | 83.8  | ### | 23.6 |   |      |

  

| Infant Formula       |  | Precision |      |      |      |      |      |      |     |     |     |     |     |      |  | Mean |
|----------------------|--|-----------|------|------|------|------|------|------|-----|-----|-----|-----|-----|------|--|------|
|                      |  | 10        |      | 20   |      | 40   |      | 100  |     | 200 |     | 500 |     |      |  |      |
|                      |  | A1        | A2   | A1   | A2   | A1   | A2   | A1   | A2  | A1  | A2  | A1  | A2  |      |  |      |
| Chlorate             |  | 4.3       | 5.1  | 14.3 | 2.0  | 3.5  | 1.6  | 4.0  | 2.4 | 6.5 | 1.7 | 3.0 | 1.8 | 4.2  |  |      |
| Dicamba              |  | 8.2       | 14.6 | 16.5 | 14.7 | 8.8  | 7.9  | 7.5  | 5.6 | 3.4 | 2.0 | 4.2 | 2.0 | 7.9  |  |      |
| Ethephon             |  | 3.8       | 9.0  | 4.8  | 3.4  | 3.3  | 2.1  | 4.2  | 2.7 | 3.5 | 1.8 | 2.2 | 1.1 | 3.5  |  |      |
| Fosetyl Aluminium    |  | 3.1       | 6.2  | 2.0  | 6.1  | 5.2  | 1.5  | 3.5  | 2.2 | 3.8 | 3.0 | 2.4 | 3.1 | 3.5  |  |      |
| Glufosinate          |  | 11.7      | 15.4 | 24.0 | 10.7 | 13.5 | 6.5  | 7.2  | 6.1 | 8.9 | 4.9 | 3.8 | 3.9 | 8.9  |  |      |
| Glyphosate           |  | 8.8       | 12.0 | 10.1 | 6.0  | 7.4  | 3.8  | 6.6  | 2.8 | 3.0 | 2.1 | 1.5 | 1.4 | 5.4  |  |      |
| HEPA                 |  | 5.8       | 4.8  | 12.2 | 2.4  | 4.9  | 2.5  | 4.0  | 3.8 | 1.6 | 2.8 | 1.4 | 0.9 | 3.9  |  |      |
| Maleic Hydrzide      |  | 21.7      | 44.6 | 13.9 | 17.9 | 7.1  | 19.2 | 8.4  | 4.6 | 8.7 | 9.1 | 6.7 | 2.7 | 13.7 |  |      |
| MPPA                 |  | 3.8       | 4.2  | 8.5  | 3.7  | 4.8  | 2.1  | 3.7  | 2.0 | 2.3 | 1.8 | 1.6 | 0.5 | 3.3  |  |      |
| N-Acetyl AMPA        |  | 2.6       | 5.1  | 10.7 | 5.0  | 4.0  | 3.3  | 2.0  | 2.7 | 3.4 | 2.1 | 2.4 | 1.0 | 3.7  |  |      |
| N-acetyl glufosinate |  | 8.6       | 6.2  | 9.1  | 8.3  | 5.1  | 3.6  | 4.7  | 2.2 | 1.8 | 2.1 | 1.3 | 1.0 | 4.5  |  |      |
| N-acetyl Glyphosate  |  | 5.7       | 6.4  | 11.0 | 3.9  | 3.7  | 1.5  | 3.6  | 3.7 | 3.4 | 1.5 | 2.2 | 1.1 | 4.0  |  |      |
| Perchlorate          |  | 2.7       | 2.7  | 8.2  | 2.7  | 4.0  | 0.7  | 3.8  | 1.9 | 4.5 | 2.2 | 3.6 | 1.0 | 3.2  |  |      |
| Phosphonic acid      |  | 7.6       | 1.4  | 7.6  | 3.1  | 39.5 | 10.9 | 12.0 | 4.4 | 6.1 | 2.5 | 6.4 | 1.4 | 8.6  |  |      |

38

39 Table 5b – Repeatability for fruit and vegetables

| Carrot               |       |       |         |         |       |       |       |       |       |       |       |       |      |      |
|----------------------|-------|-------|---------|---------|-------|-------|-------|-------|-------|-------|-------|-------|------|------|
| Accuracy             |       |       |         |         |       |       |       |       |       |       |       |       |      |      |
| 10                   |       |       | 20      |         |       | 50    |       |       | 100   |       |       | 250   |      |      |
| A1                   | A2    | A1    | A2      | A1      | A2    | A1    | A2    | A1    | A2    | A1    | A2    | Mean  | s    | % CV |
| AMPA                 | 76.1  | 76.0  | 79.4    | 75.4    | 77.1  | 85.2  | 74.4  | 73.9  | 76.9  | 77.9  | 77.3  | 3.2   | 4.2  |      |
| Chlorate             | 98.4  | 99.8  | 92.5    | 98.9    | 108.0 | 109.7 | 101.3 | 102.6 | 111.1 | 111.4 | 103.4 | 6.4   | 6.2  |      |
| Cyanuric Acid        | 0.0   | 0.0   | 165.4   | 162.1   | 122.5 | 119.8 | 114.6 | 108.6 | 117.6 | 119.6 | 117.1 | 4.9   | 4.2  |      |
| Dicamba              | 0.0   | 0.0   | 80.2    | 71.2    | 85.0  | 103.1 | 84.9  | 81.8  | 85.4  | 89.4  | 85.1  | 9.0   | 10.6 |      |
| Ethephon             | 134.4 | 134.7 | 111.6   | 114.9   | 120.8 | 130.3 | 104.2 | 104.5 | 99.4  | 104.5 | 115.9 | 13.4  | 11.6 |      |
| Fosetyl Aluminium    | 110.9 | 111.3 | 82.2    | 88.8    | 94.6  | 97.2  | 91.6  | 91.2  | 91.1  | 92.3  | 95.1  | 9.3   | 9.8  |      |
| Glufosinate          | 84.8  | 79.0  | 75.4    | 78.4    | 87.7  | 94.4  | 73.0  | 75.4  | 84.5  | 84.7  | 81.7  | 6.6   | 8.1  |      |
| Glyphosate           | 86.5  | 88.1  | 87.4    | 92.4    | 102.7 | 104.4 | 87.9  | 88.6  | 94.7  | 93.2  | 92.6  | 6.4   | 6.9  |      |
| HEPA                 | 122.4 | 114.8 | 121.3   | 113.5   | 100.6 | 99.5  | 99.7  | 99.5  | 98.6  | 97.8  | 106.8 | 10.0  | 9.4  |      |
| Maleic Hydrazide     | 103.9 | 106.7 | 104.1   | 108.8   | 98.7  | 89.8  | 93.1  | 93.4  | 100.1 | 98.2  | 99.7  | 6.3   | 6.3  |      |
| MPPA                 | 78.6  | 82.5  | 68.5    | 70.3    | 74.6  | 79.1  | 81.9  | 83.4  | 86.4  | 87.5  | 79.3  | 6.4   | 8.1  |      |
| N-Acetyl AMPA        | 99.0  | 103.6 | 87.2    | 90.0    | 98.5  | 102.7 | 94.9  | 96.0  | 95.7  | 96.7  | 96.4  | 5.1   | 5.2  |      |
| N-acetyl glufosinate | 73.0  | 76.7  | 66.4    | 66.9    | 89.5  | 91.8  | 82.9  | 85.2  | 81.4  | 81.0  | 79.5  | 8.7   | 11.0 |      |
| N-acetyl Glyphosate  | 94.4  | 97.0  | 94.1    | 98.4    | 110.8 | 113.7 | 98.4  | 100.0 | 105.3 | 104.9 | 101.7 | 6.7   | 6.6  |      |
| Perchlorate          | 105.3 | 106.3 | 99.9    | 106.0   | 110.4 | 111.7 | 101.5 | 104.8 | 107.6 | 107.4 | 106.1 | 3.6   | 3.4  |      |
| Phosphonic acid      | 85.1  | 86.8  | 0.0     | 0.0     | 41.5  | 46.7  | 73.7  | 73.4  | 73.8  | 76.8  | 78.3  | 6.1   | 7.8  |      |
| Precision            |       |       |         |         |       |       |       |       |       |       |       |       |      |      |
| 10.0                 |       |       | 20.0    |         |       | 50.0  |       |       | 100.0 |       |       | 250.0 |      |      |
| A1                   | A2    | A1    | A2      | A1      | A2    | A1    | A2    | A1    | A2    | A1    | A2    | Mean  | s    | % CV |
| AMPA                 | 11.7  | 11.2  | 5.9     | 9.2     | 7.4   | 5.8   | 5.1   | 4.2   | 3.1   | 2.4   | 6.6   |       |      |      |
| Chlorate             | 4.5   | 2.6   | 1.6     | 2.3     | 2.0   | 2.5   | 3.8   | 5.1   | 3.9   | 3.2   | 3.1   |       |      |      |
| Cyanuric Acid        | NA    | NA    | 6.5     | 5.9     | 4.8   | 7.4   | 2.8   | 6.0   | 4.0   | 1.6   | 4.4   |       |      |      |
| Dicamba              | NA    | NA    | 21.5    | 16.7    | 11.6  | 8.8   | 12.8  | 9.8   | 6.0   | 6.2   | 11.7  |       |      |      |
| Ethephon             | 11.6  | 11.4  | 7.0     | 8.2     | 4.6   | 2.0   | 6.5   | 9.3   | 3.7   | 1.4   | 6.6   |       |      |      |
| Fosetyl Aluminium    | 2.1   | 2.7   | 2.1     | 2.0     | 1.2   | 1.7   | 3.2   | 4.3   | 2.4   | 2.5   | 2.4   |       |      |      |
| Glufosinate          | 12.7  | 4.6   | 8.9     | 6.9     | 5.4   | 1.6   | 5.8   | 9.0   | 2.8   | 3.8   | 6.1   |       |      |      |
| Glyphosate           | 4.2   | 2.8   | 2.7     | 2.7     | 2.5   | 2.1   | 5.4   | 4.2   | 1.8   | 2.1   | 3.0   |       |      |      |
| HEPA                 | 3.1   | 3.2   | 4.2     | 5.9     | 4.5   | 7.4   | 4.2   | 4.4   | 2.0   | 3.0   | 4.2   |       |      |      |
| Maleic Hydrazide     | 8.5   | 18.3  | 25.5    | 15.1    | 12.7  | 11.2  | 9.3   | 7.8   | 4.7   | 6.9   | 12.0  |       |      |      |
| MPPA                 | 3.3   | 1.8   | 2.2     | 2.6     | 1.3   | 3.9   | 3.2   | 3.0   | 2.4   | 1.6   | 2.5   |       |      |      |
| N-Acetyl AMPA        | 3.6   | 1.9   | 4.0     | 2.8     | 2.8   | 1.7   | 4.4   | 4.3   | 3.3   | 2.8   | 3.2   |       |      |      |
| N-acetyl glufosinate | 4.4   | 4.2   | 2.9     | 1.5     | 3.3   | 3.7   | 3.0   | 2.7   | 2.3   | 2.5   | 3.0   |       |      |      |
| N-acetyl Glyphosate  | 3.7   | 3.2   | 1.7     | 1.7     | 1.8   | 1.5   | 3.4   | 4.8   | 2.9   | 3.5   | 2.8   |       |      |      |
| Perchlorate          | 1.6   | 2.0   | 2.0     | 1.5     | 1.2   | 2.6   | 4.5   | 4.8   | 3.9   | 4.0   | 2.8   |       |      |      |
| Phosphonic acid      | 2.6   | 2.4   | #DIV/0! | #DIV/0! | 6.6   | 7.5   | 4.4   | 4.2   | 2.5   | 3.8   | 4.2   |       |      |      |
| Orange               |       |       |         |         |       |       |       |       |       |       |       |       |      |      |
| Accuracy             |       |       |         |         |       |       |       |       |       |       |       |       |      |      |
| 10                   |       |       | 20      |         |       | 50    |       |       | 100   |       |       | 250   |      |      |
| A1                   | A2    | A1    | A2      | A1      | A2    | A1    | A2    | A1    | A2    | A1    | A2    | Mean  | s    | % CV |
| AMPA                 | 96.2  | 95.3  | 90.9    | 85.0    | 83.0  | 88.6  | 87.0  | 90.4  | 83.4  | 84.1  | 88.4  | 4.8   | 5.4  |      |
| Chlorate             | 102.9 | 94.8  | 99.4    | 99.7    | 93.6  | 91.3  | 92.5  | 98.3  | 97.3  | 92.6  | 96.2  | 3.8   | 4.0  |      |
| Cyanuric Acid        | 98.6  | 100.2 | 101.5   | 96.0    | 85.7  | 87.0  | 84.9  | 81.5  | 82.1  | 83.6  | 84.1  | 2.1   | 2.5  |      |
| Dicamba              | 127.7 | 120.1 | 97.4    | 109.7   | 115.3 | 97.8  | 103.0 | 98.4  | 101.0 | 99.5  | 102.8 | 6.5   | 6.3  |      |
| Ethephon             | 103.5 | 104.6 | 104.7   | 117.2   | 115.5 | 109.6 | 96.8  | 96.7  | 96.3  | 98.8  | 104.4 | 7.6   | 7.3  |      |
| Fosetyl Aluminium    | 100.6 | 94.4  | 98.4    | 95.4    | 92.2  | 93.7  | 93.2  | 95.9  | 92.0  | 91.7  | 94.8  | 2.9   | 3.1  |      |
| Glufosinate          | 95.9  | 81.6  | 91.5    | 90.6    | 91.7  | 86.3  | 83.0  | 81.5  | 86.7  | 84.1  | 87.3  | 4.9   | 5.6  |      |
| Glyphosate           | 76.7  | 68.9  | 73.2    | 82.1    | 75.0  | 69.4  | 65.7  | 67.3  | 67.2  | 71.2  | 71.7  | 5.1   | 7.1  |      |
| HEPA                 | 105.1 | 90.7  | 94.3    | 97.7    | 99.4  | 104.2 | 88.8  | 92.6  | 71.2  | 98.3  | 94.2  | 9.7   | 10.3 |      |
| Maleic Hydrazide     | 92.7  | 76.2  | 108.9   | 118.2   | 101.3 | 97.9  | 99.3  | 95.1  | 80.6  | 81.9  | 95.2  | 13.1  | 13.7 |      |
| MPPA                 | 101.0 | 92.4  | 93.2    | 93.4    | 78.0  | 83.3  | 83.3  | 88.7  | 84.8  | 80.4  | 87.8  | 7.1   | 8.1  |      |
| N-Acetyl AMPA        | 102.6 | 98.3  | 94.6    | 96.0    | 93.8  | 99.5  | 89.2  | 94.2  | 92.1  | 94.7  | 95.5  | 3.8   | 4.0  |      |
| N-acetyl glufosinate | 103.8 | 92.3  | 111.9   | 101.9   | 98.2  | 99.2  | 92.6  | 94.6  | 89.6  | 90.2  | 97.4  | 7.0   | 7.2  |      |
| N-acetyl Glyphosate  | 64.5  | 64.2  | 84.1    | 72.9    | 65.8  | 63.5  | 62.2  | 61.9  | 61.3  | 61.4  | 66.2  | 7.2   | 10.8 |      |
| Perchlorate          | 85.5  | 78.1  | 84.3    | 80.9    | 71.5  | 73.9  | 78.9  | 79.0  | 77.2  | 74.6  | 83.9  | 4.5   | 5.8  |      |
| Phosphonic acid      | 97.6  | 93.6  | 77.4    | 94.8    | 75.3  | 81.8  | 78.9  | 78.2  | 77.8  | 77.3  | 83.9  | 9.2   | 10.9 |      |
| Precision            |       |       |         |         |       |       |       |       |       |       |       |       |      |      |
| 10.0                 |       |       | 20.0    |         |       | 50.0  |       |       | 100.0 |       |       | 250.0 |      |      |
| A1                   | A2    | A1    | A2      | A1      | A2    | A1    | A2    | A1    | A2    | A1    | A2    | Mean  | s    | % CV |
| AMPA                 | 30.8  | 17.8  | 16.1    | 20.5    | 6.9   | 3.9   | 5.8   | 7.9   | 3.2   | 1.4   | 11.4  |       |      |      |
| Chlorate             | 11.6  | 2.4   | 6.3     | 1.6     | 5.2   | 3.0   | 2.0   | 4.6   | 7.1   | 3.3   | 4.7   |       |      |      |
| Cyanuric Acid        | 9.2   | 14.9  | 10.6    | 6.4     | 7.7   | 9.5   | 2.6   | 8.9   | 8.7   | 3.6   | 6.8   |       |      |      |
| Dicamba              | 13.9  | 13.9  | 16.3    | 16.0    | 12.8  | 5.9   | 11.5  | 9.7   | 8.2   | 9.3   | 11.2  |       |      |      |
| Ethephon             | 7.8   | 5.1   | 8.1     | 11.5    | 6.7   | 4.3   | 4.6   | 6.3   | 4.9   | 2.4   | 6.2   |       |      |      |
| Fosetyl Aluminium    | 14.3  | 2.6   | 3.4     | 3.1     | 2.6   | 3.7   | 2.1   | 2.6   | 4.7   | 1.6   | 4.1   |       |      |      |
| Glufosinate          | 12.3  | 10.6  | 3.6     | 9.6     | 2.6   | 7.5   | 7.6   | 6.2   | 5.7   | 5.3   | 7.1   |       |      |      |
| Glyphosate           | 15.1  | 10.9  | 15.6    | 4.7     | 7.4   | 8.2   | 6.8   | 2.8   | 5.4   | 5.3   | 8.2   |       |      |      |
| HEPA                 | 17.9  | 24.7  | 9.5     | 4.3     | 3.3   | 6.9   | 2.4   | 7.0   | 5.3   | 1.7   | 8.3   |       |      |      |
| Maleic Hydrazide     | 9.8   | 12.9  | 11.6    | 11.5    | 4.2   | 17.5  | 7.1   | 6.3   | 15.0  | 8.4   | 10.4  |       |      |      |
| MPPA                 | 19.3  | 3.8   | 15.0    | 3.4     | 4.6   | 15.5  | 1.8   | 13.2  | 12.4  | 1.2   | 9.0   |       |      |      |
| N-Acetyl AMPA        | 11.5  | 3.8   | 8.6     | 2.2     | 2.8   | 7.7   | 1.1   | 8.4   | 5.3   | 1.8   | 5.3   |       |      |      |
| N-acetyl glufosinate | 5.3   | 5.6   | 7.1     | 4.3     | 1.9   | 5.9   | 3.0   | 5.1   | 2.6   | 2.0   | 4.3   |       |      |      |
| N-acetyl Glyphosate  | 12.5  | 5.4   | 12.6    | 9.7     | 7.1   | 4.4   | 4.1   | 3.6   | 1.5   | 4.0   | 6.5   |       |      |      |
| Perchlorate          | 12.7  | 2.1   | 12.9    | 2.6     | 4.6   | 8.4   | 2.3   | 9.9   | 9.0   | 2.1   | 6.7   |       |      |      |
| Phosphonic acid      | 8.7   | 8.5   | 8.5     | 6.8     | 5.7   | 7.2   | 9.6   | 4.5   | 5.6   | 2.0   | 6.5   |       |      |      |
| Tomato               |       |       |         |         |       |       |       |       |       |       |       |       |      |      |
| Accuracy             |       |       |         |         |       |       |       |       |       |       |       |       |      |      |
| 10                   |       |       | 20      |         |       | 50    |       |       | 100   |       |       | 250   |      |      |
| A1                   | A2    | A1    | A2      | A1      | A2    | A1    | A2    | A1    | A2    | A1    | A2    | Mean  | s    | % CV |
| AMPA                 | 114.8 | 112.3 | 82.6    | 84.7    | 86.3  | 84.9  | 93.2  | 94.3  | 80.8  | 80.0  | 91.4  | 12.6  | 13.8 |      |
| Chlorate             | 123.5 | 115.7 | 100.5   | 105.0   | 98.3  | 100.5 | 91.5  | 94.8  | 114.0 | 122.3 | 106.6 | 11.5  | 10.7 |      |
| Cyanuric Acid        | 87.1  | 83.3  | 106.2   | 109.3   | 104.3 | 103.1 | 95.0  | 94.9  | 92.5  | 96.0  | 97.6  | 4.8   | 5.0  |      |
| Dicamba              | 92.2  | 100.4 | 109.1   | 108.8   | 99.0  | 104.7 | 101.4 | 105.8 | 108.6 | 113.2 | 106.4 | 4.7   | 4.4  |      |
| Ethephon             | 139.8 | 141.0 | 120.6   | 116.9   | 110.5 | 115.5 | 143.6 | 145.4 | 104.5 | 103.9 | 124.3 | 16.5  | 13.3 |      |
| Fosetyl Aluminium    | 102.8 | 103.4 | 91.6    | 97.6    | 83.4  | 84.8  | 84.0  | 84.4  | 91.0  | 91.0  | 91.4  | 7.6   | 8.3  |      |
| Glufosinate          | 92.9  | 88.9  | 86.3    | 85.5    | 88.9  | 95.5  | 81.8  | 80.9  | 93.8  | 96.7  | 89.1  | 5.5   | 6.2  |      |
| Glyphosate           | 86.8  | 92.8  | 75.5    | 69.8    | 57.7  | 57.7  | 67.5  | 65.1  | 55.2  | 57.5  | 68.6  | 13.0  | 18.9 |      |
| HEPA                 | 100.4 | 100.1 | 99.4    | 91.8    | 100.4 | 110.1 | 100.3 | 104.0 | 95.7  | 97.6  | 100.0 | 4.8   | 4.8  |      |
| Maleic Hydrazide     | 94.8  | 97.7  | 101.9   | 87.5    | 99.5  | 109.6 | 101.7 | 103.0 | 86.2  | 96.9  | 97.9  | 7.1   | 7.2  |      |
| MPPA                 | 97.3  | 102.9 | 90.3    | 96.7    | 84.2  | 88.1  | 91.5  | 91.8  | 79.2  | 79.6  | 90.2  | 7.7   | 8.5  |      |
| N-Acetyl AMPA        | 90.7  | 99.2  | 93.3    | 90.9    | 91.1  | 92.1  | 99.4  | 99.9  | 92.0  | 92.5  | 94.1  | 3.8   | 4.0  |      |
| N-acetyl glufosinate | 91.7  | 105.3 | 86.0    | 88.4    | 87.5  | 94.8  | 95.3  | 96.1  | 92.0  | 92.6  | 93.1  | 5.5   | 5.9  |      |
| N-acetyl Glyphosate  | 84.4  | 69.3  | 69.3    | 63.4    | 63.9  | 63.3  | 70.8  | 67.1  | 64.5  | 67.0  | 68.3  | 6.3   | 9.2  |      |
| Per                  |       |       |         |         |       |       |       |       |       |       |       |       |      |      |

41 Fig S1(a) – transitions from 0.1µg/l recoveries in wheat a) AMPA, b) chlorate, c) cyanuric acid (oranges at  
 42 1µg/kg), d) dicamba, e) ethephon, f) fosetyl aluminium, g) glufosinate, h) glyphosate  
 43

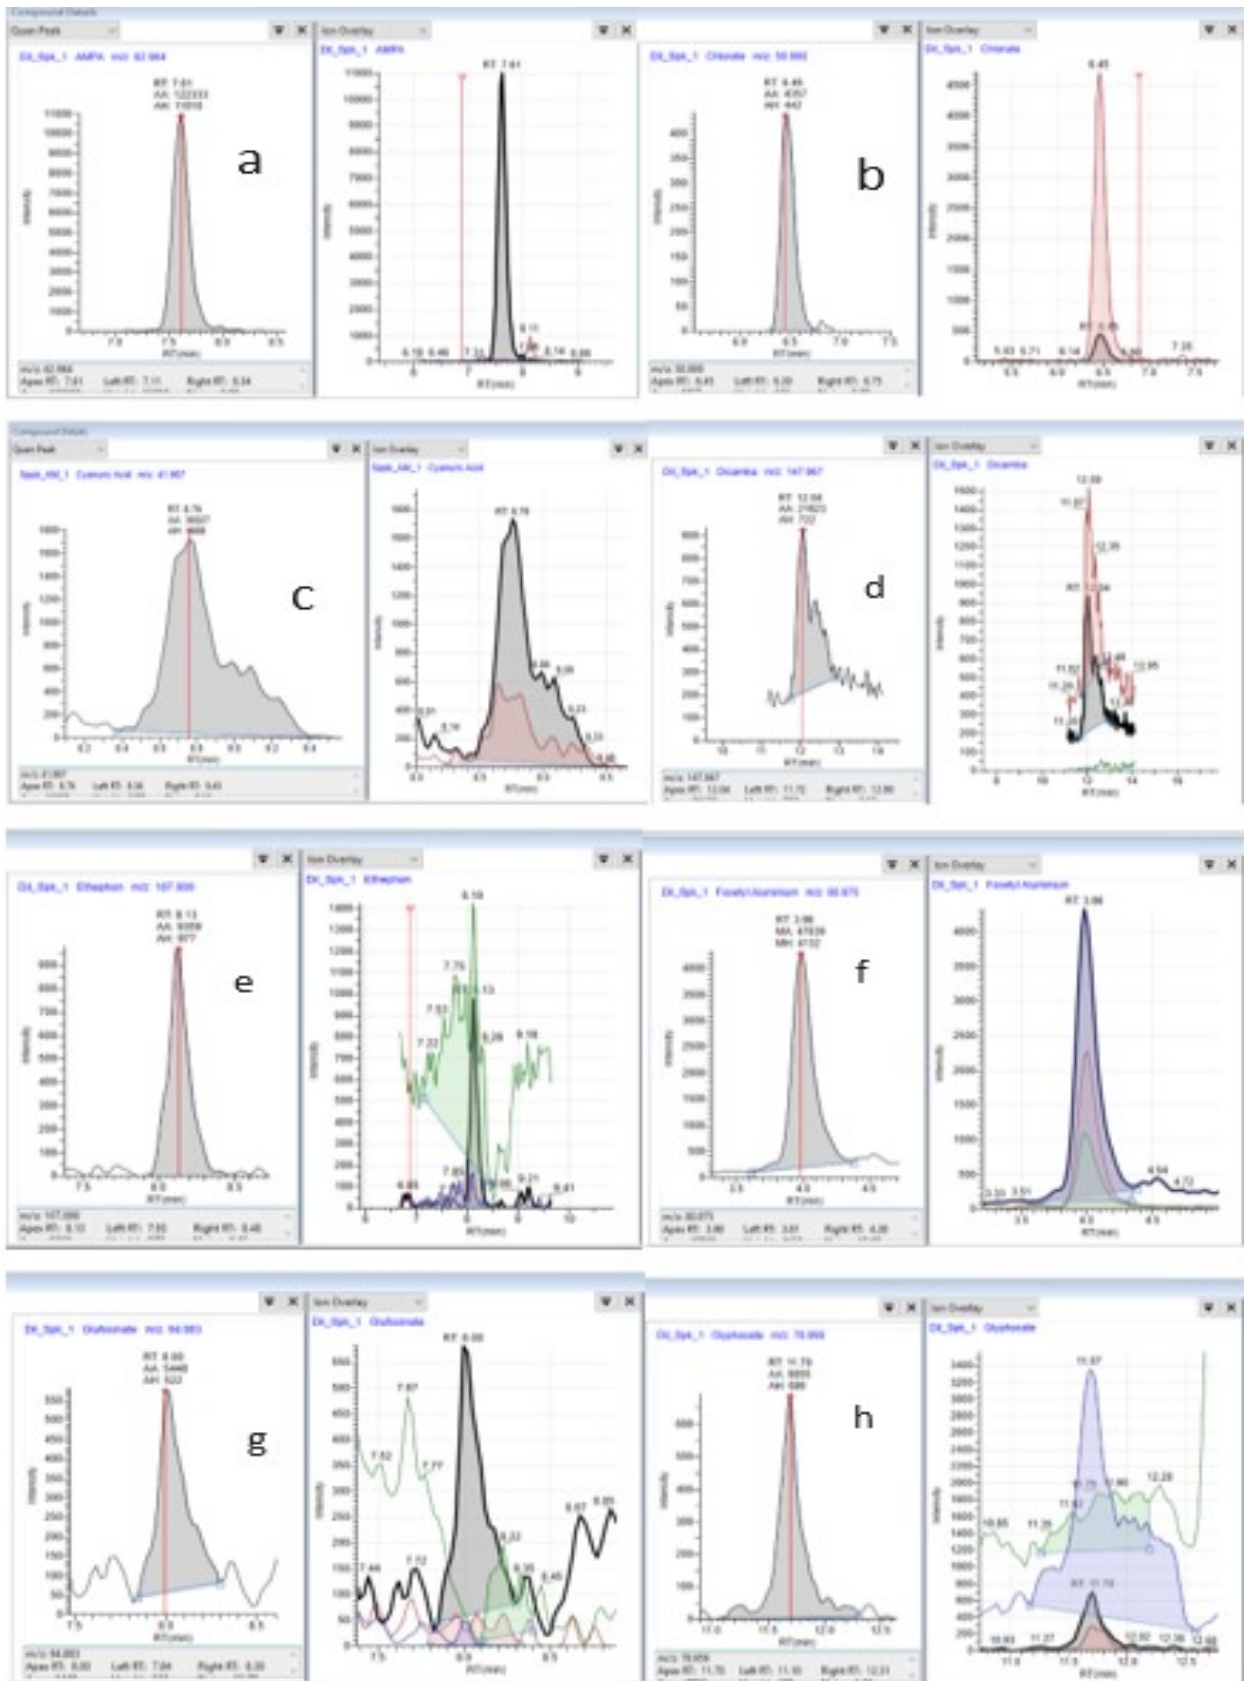

44

45 Fig S1 (b) - transitions from 0.1µg/l recoveries in infant formula a) HEPA, b) Maleic Hydrazide, c) MPPA,  
 46 d) N-acetyl ampa, e) N-acetyl glufosinate, f) N-acetyl glyphosate, g) perchlorate, h) phosphonic acid  
 47

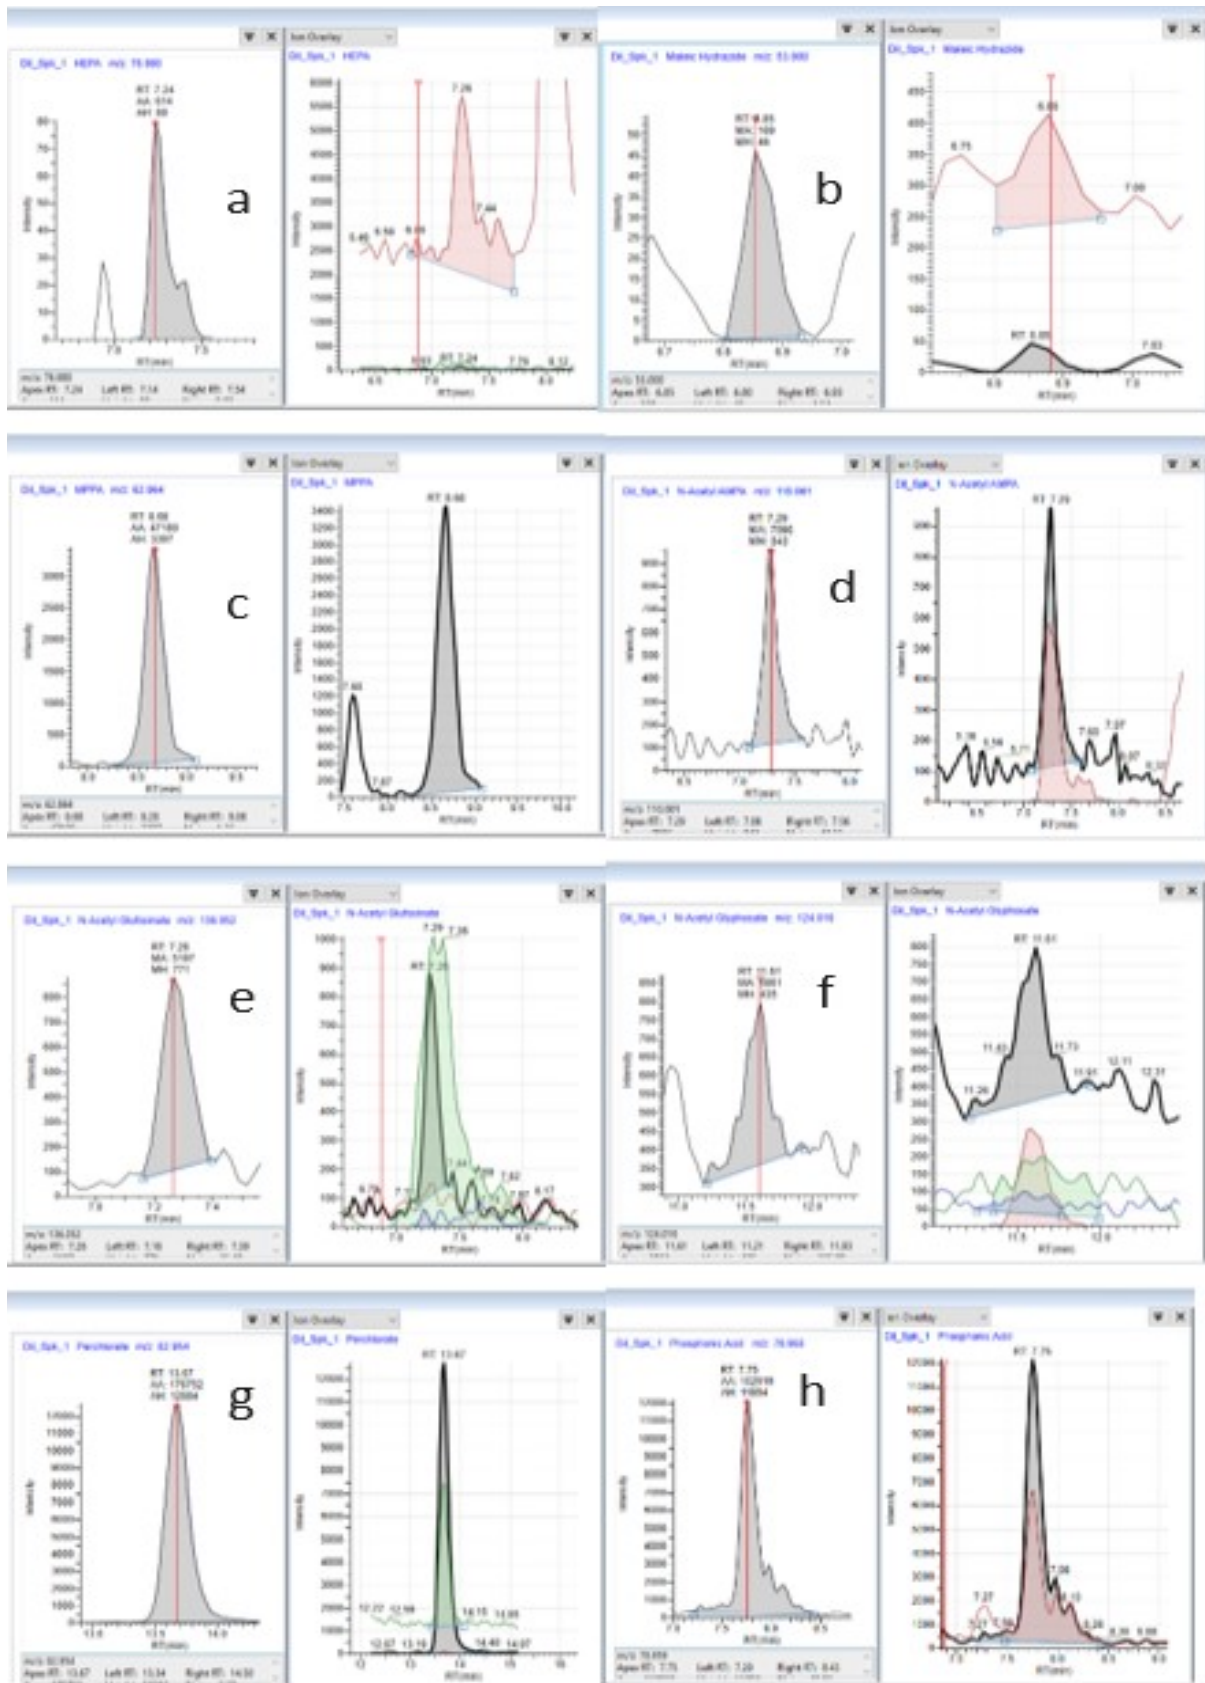

48

49 Fig S2 – Ion Ratio data for the matrices validated in this study

50

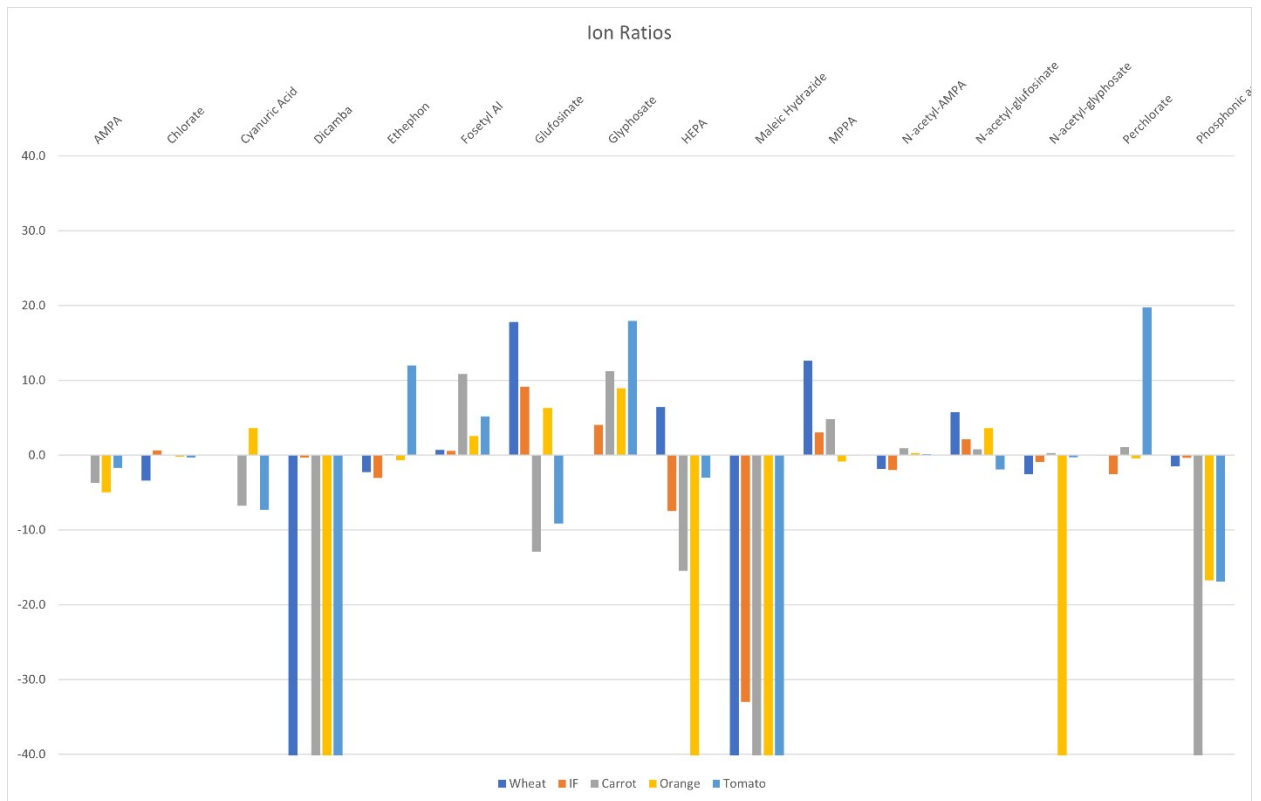

51  
52  
53  
54  
55  
56  
57  
58  
59  
60  
61  
62  
63  
64  
65  
66  
67  
68  
69  
70  
71  
72  
73  
74  
75  
76

77 Fig S3 – Matrix effects for (a) wheat and (b) Infant Formula  
 78

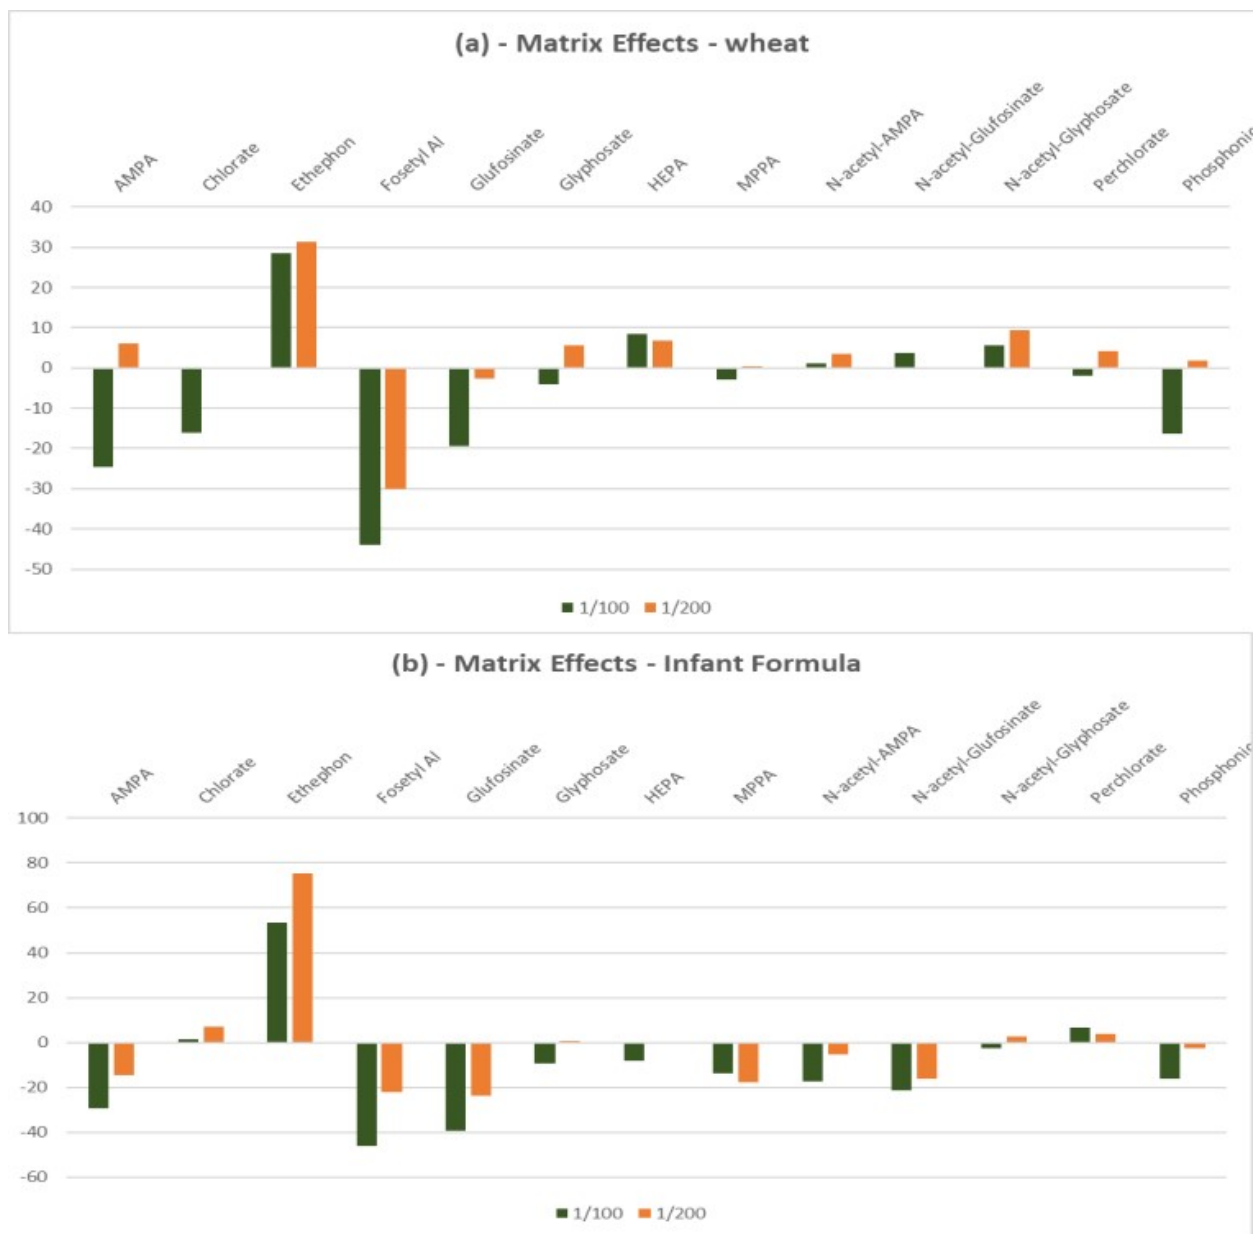

79  
 80  
 81  
 82  
 83  
 84  
 85  
 86  
 87  
 88  
 89  
 90  
 91  
 92



93 Fig S4 – Matix Effects fruit and vegetables – (a) oranges, (b) Tomatoes and (c) carrots  
 94

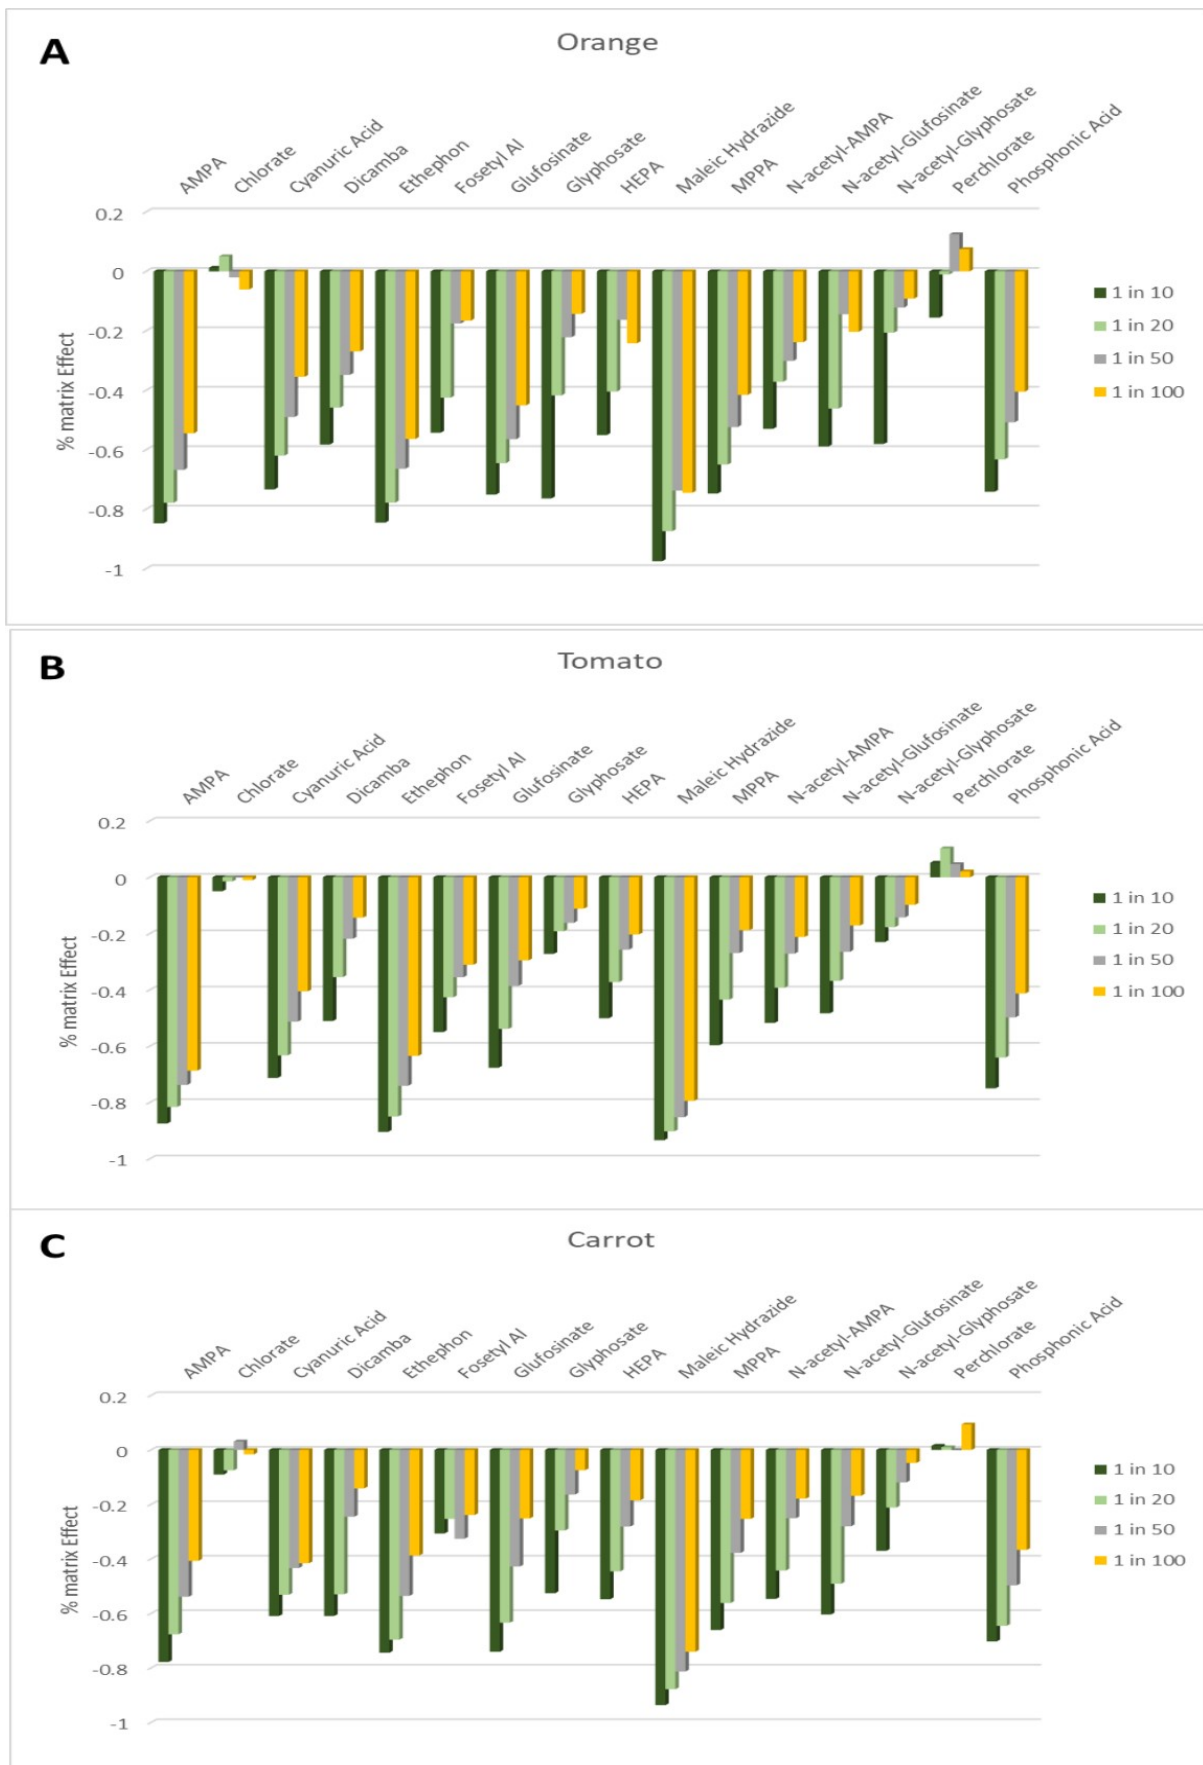

95
